# Supplementary material
Source: PubMed Central journal article supplement (PMC4991572)

## Supplemental Tables and Figure

### Comparative Decellularization and Recellularization of Wild Type and Alpha 1,3 Galactosyltransferase Knockout Pig Lungs: A Model for *Ex Vivo* Xenogeneic Lung Bioengineering and Transplantation

Joseph Platz<sup>a#</sup>, Nicholas R. Bonenfant<sup>a#</sup>, Franziska E. Uhl<sup>a</sup>, Amy L. Coffey<sup>a</sup>, Tristan McKnight<sup>a</sup>, Charles Parsons<sup>a</sup>, Dino Sokocevic<sup>a,1</sup>, Zachary D. Borg<sup>a</sup>, Ying Wai Lam<sup>b</sup>, Bin Deng<sup>b</sup>, Julia G. Fields<sup>b</sup>, Michael DeSarno<sup>c</sup>, Roberto Loi<sup>d</sup>, Andrew M. Hoffman<sup>e</sup>, John Bianchi<sup>g</sup>, Brian Dacken<sup>h</sup>, Thomas Petersen<sup>i</sup>, Darcy E. Wagner<sup>a,j</sup>, Daniel J. Weiss<sup>a,\*</sup>

**Supplemental Table 1:** Details of Decellularization Protocol

|                  | solution              |         | amount (Liters) |                      |       |
|------------------|-----------------------|---------|-----------------|----------------------|-------|
|                  |                       |         | via trachea     | via pulmonary artery | total |
| <b>Day one</b>   | DI water <b>5x PS</b> | washing | 3x 2-3          | 3x 2-3               | 12-18 |
|                  | 0.1 % Triton          | washing | 2-3             | 2-3                  | 4-6   |
|                  | 0.1 % Triton          | filling | 2-3             | 2-3                  | 4-6   |
| <b>Day two</b>   | DI water <b>5x PS</b> | washing | 3x 2-3          | 3x 2-3               | 12-18 |
|                  | 2% SDC                | washing | 2-3             | 2-3                  | 4-6   |
|                  | 2% SDC                | filling | 2-3             | 2-3                  | 4-6   |
| <b>Day three</b> | DI water <b>1x PS</b> | washing | 3x 2-3          | 3x 2-3               | 12-18 |
|                  | 1M NaCl               | washing | 2-3             | 2-3                  | 4-6   |
|                  | 1M NaCl               | filling | 2-3             | 2-3                  | 4-6   |
|                  | DI water <b>1x PS</b> | washing | 3x 2-3          | 3x 2-3               | 12-18 |
|                  | DNase                 | washing | 2-3             | 2-3                  | 4-6   |
|                  | DNase                 | filling | 2-3             | 2-3                  | 4-6   |
|                  | DI water <b>1x PS</b> | washing | 3x 2-3          | 3x 2-3               | 12-18 |
|                  | Peracetic acid        | washing | 2-3             | 2-3                  | 4-6   |
|                  | Peracetic acid        | filling | 2-3             | 2-3                  | 4-6   |
|                  | DI water <b>1x PS</b> | washing | 3x 2-3          | 3x 2-3               | 12-18 |
|                  | Storage solution      | washing | 2x 2-3          | 2x 2-3               | 8-12  |
|                  | Storage solution      | filling | 2-3             | 2-3                  | 4-6   |

PS: penicillin-streptomycin

**Supplementary Table 2.** Spearman rank correlation coefficients comparing mass spectrometry proteomic peptide hits of positively identified proteins in individual samples from decellularized  $\alpha$ -gal KO ( $\alpha$ Gal) and wild type (WT) pig lungs

| Variable       | aGal_1 | aGal_2 | aGal_3 | aGal_4 | aGal_5 | aGal_6 | aGal_7 | aGal_8 | aGal_9 | aGal_10 | WT_1 | WT_2 | WT_3 | WT_4 | WT_5 | WT_6 |
|----------------|--------|--------|--------|--------|--------|--------|--------|--------|--------|---------|------|------|------|------|------|------|
| <b>aGal_1</b>  |        |        |        |        |        |        |        |        |        |         |      |      |      |      |      |      |
| <b>aGal_2</b>  | 0.85   |        |        |        |        |        |        |        |        |         |      |      |      |      |      |      |
| <b>aGal_3</b>  | 0.82   | 0.80   |        |        |        |        |        |        |        |         |      |      |      |      |      |      |
| <b>aGal_4</b>  | 0.73   | 0.77   | 0.74   |        |        |        |        |        |        |         |      |      |      |      |      |      |
| <b>aGal_5</b>  | 0.81   | 0.84   | 0.81   | 0.75   |        |        |        |        |        |         |      |      |      |      |      |      |
| <b>aGal_6</b>  | 0.76   | 0.77   | 0.82   | 0.75   | 0.79   |        |        |        |        |         |      |      |      |      |      |      |
| <b>aGal_7</b>  | 0.63   | 0.73   | 0.68   | 0.66   | 0.66   | 0.59   |        |        |        |         |      |      |      |      |      |      |
| <b>aGal_8</b>  | 0.67   | 0.74   | 0.76   | 0.63   | 0.67   | 0.67   | 0.86   |        |        |         |      |      |      |      |      |      |
| <b>aGal_9</b>  | 0.66   | 0.74   | 0.68   | 0.65   | 0.68   | 0.64   | 0.75   | 0.75   |        |         |      |      |      |      |      |      |
| <b>aGal_10</b> | 0.72   | 0.81   | 0.73   | 0.65   | 0.70   | 0.67   | 0.77   | 0.79   | 0.91   |         |      |      |      |      |      |      |
| <b>WT_1</b>    | 0.55   | 0.60   | 0.54   | 0.56   | 0.52   | 0.45   | 0.74   | 0.71   | 0.78   | 0.76    |      |      |      |      |      |      |
| <b>WT_2</b>    | 0.44   | 0.44   | 0.38   | 0.54   | 0.42   | 0.39   | 0.49   | 0.48   | 0.65   | 0.60    | 0.74 |      |      |      |      |      |
| <b>WT_3</b>    | 0.52   | 0.55   | 0.54   | 0.58   | 0.51   | 0.50   | 0.69   | 0.67   | 0.76   | 0.77    | 0.85 | 0.78 |      |      |      |      |
| <b>WT_4</b>    | 0.54   | 0.55   | 0.56   | 0.60   | 0.51   | 0.49   | 0.72   | 0.69   | 0.77   | 0.74    | 0.86 | 0.76 | 0.89 |      |      |      |
| <b>WT_5</b>    | 0.48   | 0.52   | 0.51   | 0.56   | 0.46   | 0.48   | 0.65   | 0.58   | 0.69   | 0.68    | 0.83 | 0.70 | 0.85 | 0.85 |      |      |
| <b>WT_6</b>    | 0.56   | 0.61   | 0.66   | 0.51   | 0.54   | 0.54   | 0.72   | 0.74   | 0.66   | 0.63    | 0.61 | 0.30 | 0.58 | 0.64 | 0.62 |      |

**Supplementary Table 3.** Spearman rank p-values comparing mass spectrometry proteomic peptide hits of positively identified proteins in individual samples from decellularized  $\alpha$ -gal KO ( $\alpha$ Gal) and wild type (WT) pig lungs

| Variable | aGal_1   | aGal_2   | aGal_3   | aGal_4   | aGal_5   | aGal_6   | aGal_7   | aGal_8   | aGal_9   | aGal_10  | WT_1     | WT_2     | WT_3     | WT_4     | WT_5     | WT_6 |
|----------|----------|----------|----------|----------|----------|----------|----------|----------|----------|----------|----------|----------|----------|----------|----------|------|
| aGal_1   |          |          |          |          |          |          |          |          |          |          |          |          |          |          |          |      |
| aGal_2   | < 0.0001 |          |          |          |          |          |          |          |          |          |          |          |          |          |          |      |
| aGal_3   | < 0.0001 | < 0.0001 |          |          |          |          |          |          |          |          |          |          |          |          |          |      |
| aGal_4   | < 0.0001 | < 0.0001 | < 0.0001 |          |          |          |          |          |          |          |          |          |          |          |          |      |
| aGal_5   | < 0.0001 | < 0.0001 | < 0.0001 | < 0.0001 |          |          |          |          |          |          |          |          |          |          |          |      |
| aGal_6   | < 0.0001 | < 0.0001 | < 0.0001 | < 0.0001 | < 0.0001 |          |          |          |          |          |          |          |          |          |          |      |
| aGal_7   | < 0.0001 | < 0.0001 | < 0.0001 | < 0.0001 | < 0.0001 | < 0.0001 |          |          |          |          |          |          |          |          |          |      |
| aGal_8   | < 0.0001 | < 0.0001 | < 0.0001 | < 0.0001 | < 0.0001 | < 0.0001 | < 0.0001 |          |          |          |          |          |          |          |          |      |
| aGal_9   | < 0.0001 | < 0.0001 | < 0.0001 | < 0.0001 | < 0.0001 | < 0.0001 | < 0.0001 | < 0.0001 |          |          |          |          |          |          |          |      |
| aGal_10  | < 0.0001 | < 0.0001 | < 0.0001 | < 0.0001 | < 0.0001 | < 0.0001 | < 0.0001 | < 0.0001 | < 0.0001 |          |          |          |          |          |          |      |
| WT_1     | < 0.0001 | < 0.0001 | < 0.0001 | < 0.0001 | < 0.0001 | < 0.0001 | < 0.0001 | < 0.0001 | < 0.0001 | < 0.0001 |          |          |          |          |          |      |
| WT_2     | < 0.0001 | < 0.0001 | < 0.0001 | < 0.0001 | < 0.0001 | < 0.0001 | < 0.0001 | < 0.0001 | < 0.0001 | < 0.0001 | < 0.0001 |          |          |          |          |      |
| WT_3     | < 0.0001 | < 0.0001 | < 0.0001 | < 0.0001 | < 0.0001 | < 0.0001 | < 0.0001 | < 0.0001 | < 0.0001 | < 0.0001 | < 0.0001 | < 0.0001 |          |          |          |      |
| WT_4     | < 0.0001 | < 0.0001 | < 0.0001 | < 0.0001 | < 0.0001 | < 0.0001 | < 0.0001 | < 0.0001 | < 0.0001 | < 0.0001 | < 0.0001 | < 0.0001 | < 0.0001 |          |          |      |
| WT_5     | < 0.0001 | < 0.0001 | < 0.0001 | < 0.0001 | < 0.0001 | < 0.0001 | < 0.0001 | < 0.0001 | < 0.0001 | < 0.0001 | < 0.0001 | < 0.0001 | < 0.0001 | < 0.0001 |          |      |
| WT_6     | < 0.0001 | < 0.0001 | < 0.0001 | < 0.0001 | < 0.0001 | < 0.0001 | < 0.0001 | < 0.0001 | < 0.0001 | < 0.0001 | < 0.0001 | 0.0011   | < 0.0001 | < 0.0001 | < 0.0001 |      |

**Supplemental Table 4 – Total spectral counts for positively identified proteins in acellular  $\alpha$ -gal KO and wildtype (WT) lungs**

| Gene Name           | Accession No. | Alpha-gal KO |    |    |    |    |    |    |    |    |    | WT (by Sample) |    |    |    |    |    |    |    |    |    |    |    |
|---------------------|---------------|--------------|----|----|----|----|----|----|----|----|----|----------------|----|----|----|----|----|----|----|----|----|----|----|
|                     |               | 1            | 2  | 3  | 4  | 5  | 6  | 7  | 8  | 9  | 10 | 1A             | 1B | 2A | 2B | 3A | 3B | 4A | 4B | 5A | 5B | 6A | 6B |
| <b>Cytoplasmic</b>  |               |              |    |    |    |    |    |    |    |    |    |                |    |    |    |    |    |    |    |    |    |    |    |
| CBR2                | CBR2_PIG      | 10           | 6  | 4  | 3  | 9  | 8  | 11 | 19 | 4  | 13 | 11             | 14 | 39 | 40 | 18 | 15 | 18 | 23 | 20 | 19 | 5  | 14 |
| DPYSL2              | I3LJE2_PIG    | 8            | 7  | 7  | 4  | 3  | 3  | 3  | 5  | 4  | 2  | 0              | 3  | 4  | 3  | 0  | 0  | 0  | 6  | 0  | 0  | 0  | 0  |
| EEF1A               | Q0PY11_PIG    | 0            | 2  | 0  | 4  | 2  | 1  | 2  | 0  | 4  | 0  | 5              | 4  | 9  | 9  | 0  | 0  | 4  | 3  | 5  | 0  | 7  | 0  |
| EEF2                | I3LII3_PIG    | 6            | 6  | 7  | 4  | 7  | 6  | 2  | 3  | 0  | 1  | 0              | 0  | 7  | 4  | 0  | 0  | 0  | 0  | 0  | 0  | 0  | 0  |
| HSPB1               | HSPB1_PIG     | 0            | 2  | 3  | 8  | 5  | 1  | 8  | 0  | 4  | 3  | 5              | 7  | 9  | 6  | 4  | 0  | 4  | 6  | 7  | 4  | 0  | 0  |
| HSPG2               | F1SU03_PIG    | 3            | 3  | 2  | 4  | 1  | 0  | 4  | 0  | 3  | 1  | 0              | 0  | 0  | 0  | 0  | 0  | 5  | 0  | 6  | 5  | 4  |    |
| Ssc.41914           | F1STM4_PIG    | 0            | 0  | 0  | 0  | 2  | 0  | 0  | 0  | 0  | 0  | 0              | 0  | 0  | 0  | 0  | 0  | 0  | 0  | 0  | 0  | 0  | 0  |
| <b>Cytoskeletal</b> |               |              |    |    |    |    |    |    |    |    |    |                |    |    |    |    |    |    |    |    |    |    |    |
| ACTA2               | C7AI81_PIG    | 8            | 10 | 9  | 11 | 14 | 12 | 15 | 17 | 20 | 20 | 20             | 30 | 38 | 30 | 25 | 27 | 22 | 20 | 26 | 19 | 22 | 7  |
| ACTB                | ACTB_PIG      | 17           | 13 | 12 | 16 | 13 | 10 | 19 | 18 | 22 | 22 | 34             | 44 | 52 | 43 | 35 | 39 | 35 | 30 | 29 | 24 | 16 | 15 |
| ACTC1               | B6VNT8_PIG    | 8            | 11 | 10 | 12 | 14 | 12 | 16 | 19 | 21 | 23 | 22             | 30 | 38 | 31 | 25 | 27 | 22 | 20 | 26 | 19 | 22 | 7  |
| CCT6A               | F1RIU3_PIG    | 4            | 8  | 3  | 7  | 6  | 4  | 0  | 0  | 0  | 0  | 0              | 0  | 0  | 0  | 0  | 0  | 0  | 0  | 0  | 0  | 0  | 0  |
| DES                 | DESM_PIG      | 6            | 8  | 6  | 7  | 11 | 8  | 7  | 4  | 17 | 13 | 6              | 3  | 10 | 10 | 5  | 0  | 3  | 0  | 5  | 0  | 4  | 0  |
| EZR                 | F1SB42_PIG    | 3            | 0  | 0  | 1  | 0  | 0  | 3  | 0  | 0  | 0  | 0              | 0  | 0  | 0  | 0  | 0  | 0  | 0  | 0  | 0  | 0  | 0  |
| FLNC                | F1SMN5_PIG    | 4            | 3  | 0  | 3  | 4  | 0  | 0  | 0  | 1  | 2  | 0              | 0  | 0  | 0  | 0  | 0  | 0  | 0  | 0  | 0  | 0  | 0  |
| HBA                 | HBA_PIG       | 4            | 4  | 6  | 4  | 4  | 3  | 5  | 9  | 17 | 11 | 28             | 29 | 26 | 22 | 23 | 22 | 28 | 26 | 40 | 43 | 11 | 20 |
|                     | I3LJ44_PIG    | 8            | 8  | 8  | 4  | 8  | 6  | 11 | 10 | 14 | 15 | 10             | 12 | 9  | 10 | 14 | 15 | 12 | 14 | 11 | 13 | 5  | 11 |
| KRT19               | F1S0J8_PIG    | 1            | 0  | 0  | 1  | 2  | 0  | 2  | 4  | 5  | 0  | 0              | 0  | 4  | 0  | 0  | 0  | 0  | 0  | 0  | 0  | 7  | 4  |
| LOC100511457_1      | I3LV99_PIG    | 2            | 5  | 0  | 3  | 3  | 3  | 1  | 0  | 5  | 4  | 0              | 0  | 0  | 0  | 0  | 0  | 0  | 0  | 0  | 0  | 0  | 0  |
| LOC100511457_2      | I3LIE3_PIG    | 2            | 5  | 3  | 4  | 4  | 4  | 1  | 0  | 5  | 4  | 0              | 0  | 0  | 0  | 0  | 0  | 0  | 0  | 0  | 0  | 0  | 0  |
| LOC100517284        | F1RI39_PIG    | 3            | 3  | 3  | 3  | 2  | 0  | 0  | 0  | 2  | 0  | 4              | 0  | 5  | 4  | 0  | 0  | 0  | 0  | 0  | 0  | 5  | 2  |
| LOC100620928        | F1S6M7_PIG    | 16           | 10 | 11 | 8  | 11 | 16 | 7  | 11 | 15 | 15 | 15             | 19 | 20 | 16 | 11 | 10 | 22 | 17 | 13 | 11 | 13 | 10 |
| LOC100621514        | I3LDR2_PIG    | 4            | 8  | 6  | 9  | 5  | 9  | 7  | 8  | 5  | 4  | 5              | 4  | 0  | 0  | 0  | 6  | 0  | 9  | 4  | 13 | 9  |    |
| LOC100621981        | I3L5B3_PIG    | 26           | 29 | 27 | 27 | 26 | 29 | 35 | 31 | 37 | 35 | 22             | 19 | 16 | 16 | 25 | 31 | 26 | 26 | 15 | 17 | 11 | 28 |
| MACF1               | F1SV22_PIG    | 3            | 4  | 3  | 2  | 6  | 0  | 4  | 3  | 0  | 2  | 0              | 3  | 0  | 0  | 0  | 4  | 5  | 0  | 0  | 0  | 0  | 6  |

|                  |            |    |    |    |    |    |    |    |    |    |    |    |    |    |    |    |     |    |    |    |     |    |    |
|------------------|------------|----|----|----|----|----|----|----|----|----|----|----|----|----|----|----|-----|----|----|----|-----|----|----|
| MSN              | F1RTN3_PIG | 4  | 2  | 0  | 2  | 2  | 0  | 3  | 0  | 0  | 2  | 0  | 6  | 0  | 4  | 0  | 0   | 0  | 0  | 0  | 0   | 0  |    |
| MYH10            | F1SSA6_PIG | 34 | 36 | 34 | 34 | 34 | 45 | 38 | 37 | 38 | 37 | 24 | 21 | 16 | 16 | 27 | 34  | 29 | 28 | 15 | 17  | 18 | 32 |
| MYH11_1          | F1SK10_PIG | 12 | 6  | 15 | 13 | 10 | 12 | 8  | 8  | 7  | 10 | 10 | 11 | 0  | 0  | 5  | 5   | 6  | 6  | 0  | 6   | 18 | 5  |
| MYH11_2          | MYH11_PIG  | 4  | 3  | 7  | 3  | 5  | 4  | 2  | 5  | 0  | 0  | 0  | 0  | 0  | 0  | 0  | 0   | 0  | 0  | 0  | 0   | 9  | 0  |
| MYH9             | F1SKJ1_PIG | 45 | 46 | 34 | 48 | 44 | 53 | 50 | 34 | 58 | 75 | 61 | 59 | 77 | 75 | 85 | 104 | 88 | 87 | 99 | 110 | 53 | 49 |
| MYL6             | MYL6_PIG   | 3  | 2  | 3  | 3  | 1  | 2  | 0  | 3  | 5  | 5  | 13 | 12 | 8  | 7  | 5  | 0   | 4  | 3  | 4  | 4   | 0  | 0  |
| MYO1C            | I3LIL4_PIG | 6  | 6  | 8  | 8  | 9  | 8  | 7  | 9  | 4  | 4  | 9  | 4  | 3  | 4  | 4  | 3   | 7  | 8  | 9  | 6   | 0  | 2  |
| NUMA1            | F1SUX4_PIG | 1  | 0  | 0  | 0  | 2  | 1  | 4  | 2  | 4  | 2  | 0  | 0  | 0  | 0  | 0  | 0   | 0  | 0  | 0  | 0   | 0  | 2  |
| TLN1             | F1SFZ8_PIG | 6  | 6  | 5  | 9  | 9  | 2  | 20 | 12 | 5  | 5  | 15 | 14 | 18 | 25 | 16 | 19  | 18 | 20 | 16 | 17  | 0  | 9  |
| TPM3             | Q6QA25_PIG | 1  | 4  | 0  | 0  | 0  | 0  | 4  | 3  | 0  | 2  | 3  | 0  | 0  | 0  | 0  | 0   | 0  | 0  | 0  | 0   | 0  | 0  |
| TUBA1B           | F2Z5T5_PIG | 19 | 17 | 20 | 18 | 18 | 29 | 11 | 12 | 8  | 5  | 13 | 17 | 9  | 10 | 9  | 9   | 15 | 12 | 16 | 17  | 18 | 11 |
| TUBA4A           | F2Z5S8_PIG | 8  | 11 | 10 | 12 | 7  | 12 | 11 | 12 | 5  | 4  | 8  | 7  | 5  | 6  | 5  | 5   | 12 | 5  | 11 | 4   | 13 | 12 |
| TUBB             | TBB5_PIG   | 23 | 21 | 24 | 21 | 21 | 27 | 18 | 22 | 25 | 28 | 28 | 32 | 33 | 40 | 23 | 20  | 38 | 31 | 29 | 26  | 15 | 15 |
| TUBB1            | A5GFX6_PIG | 4  | 4  | 0  | 2  | 4  | 2  | 2  | 0  | 4  | 4  | 5  | 6  | 0  | 0  | 0  | 3   | 6  | 0  | 0  | 4   | 7  | 5  |
| TUBB2B           | F2Z5B2_PIG | 19 | 15 | 17 | 12 | 14 | 24 | 14 | 17 | 20 | 22 | 18 | 22 | 20 | 25 | 11 | 10  | 28 | 17 | 15 | 13  | 13 | 10 |
| TUBB4A           | F2Z5K5_PIG | 20 | 12 | 15 | 14 | 13 | 17 | 8  | 10 | 15 | 16 | 13 | 18 | 18 | 18 | 11 | 9   | 19 | 14 | 11 | 9   | 11 | 10 |
| TUBB4B           | F2Z571_PIG | 21 | 15 | 18 | 17 | 16 | 23 | 15 | 18 | 22 | 25 | 19 | 25 | 26 | 27 | 14 | 10  | 31 | 20 | 16 | 11  | 13 | 10 |
| TUBB6            | I3LBV1_PIG | 6  | 5  | 3  | 2  | 5  | 5  | 2  | 3  | 7  | 6  | 6  | 8  | 5  | 4  | 0  | 3   | 6  | 5  | 4  | 4   | 7  | 5  |
|                  | I3LCX2_PIG | 8  | 8  | 13 | 7  | 9  | 6  | 13 | 12 | 10 | 14 | 9  | 6  | 3  | 0  | 11 | 10  | 9  | 12 | 9  | 4   | 9  | 10 |
|                  | F1RJU6_PIG | 0  | 0  | 0  | 0  | 0  | 0  | 0  | 0  | 3  | 0  | 0  | 0  | 0  | 0  | 0  | 0   | 0  | 0  | 0  | 0   | 0  | 0  |
|                  | I3LIQ9_PIG | 4  | 11 | 4  | 10 | 4  | 6  | 10 | 11 | 7  | 12 | 6  | 10 | 10 | 7  | 16 | 9   | 12 | 9  | 16 | 13  | 9  | 10 |
| VCL              | VINC_PIG   | 0  | 0  | 0  | 0  | 0  | 0  | 3  | 3  | 0  | 0  | 4  | 4  | 7  | 6  | 0  | 0   | 4  | 5  | 0  | 0   | 0  | 0  |
| VIM              | VIME_PIG   | 11 | 7  | 9  | 5  | 11 | 9  | 2  | 3  | 22 | 7  | 11 | 17 | 21 | 27 | 4  | 3   | 7  | 8  | 9  | 11  | 4  | 4  |
| <b>Cytosolic</b> |            |    |    |    |    |    |    |    |    |    |    |    |    |    |    |    |     |    |    |    |     |    |    |
| YWHAZ            | F2Z558_PIG | 2  | 0  | 2  | 1  | 3  | 4  | 0  | 0  | 0  | 0  | 0  | 0  | 0  | 0  | 0  | 0   | 0  | 0  | 0  | 0   | 0  | 0  |
| <b>ECM</b>       |            |    |    |    |    |    |    |    |    |    |    |    |    |    |    |    |     |    |    |    |     |    |    |
| COL14A1          | F1S285_PIG | 4  | 4  | 3  | 4  | 4  | 5  | 2  | 4  | 2  | 0  | 0  | 6  | 3  | 3  | 0  | 5   | 0  | 0  | 0  | 0   | 4  | 6  |
| COL1A1           | F1RT61_PIG | 0  | 2  | 2  | 0  | 2  | 3  | 0  | 3  | 4  | 5  | 0  | 0  | 5  | 3  | 5  | 0   | 0  | 0  | 0  | 0   | 0  | 0  |
| COL1A2           | F1SFA7_PIG | 2  | 1  | 5  | 3  | 2  | 3  | 4  | 11 | 8  | 10 | 11 | 11 | 5  | 6  | 14 | 10  | 15 | 8  | 15 | 11  | 20 | 10 |
| COL6A1           | I3LS72_PIG | 5  | 6  | 3  | 2  | 5  | 3  | 6  | 4  | 9  | 8  | 0  | 0  | 0  | 0  | 0  | 5   | 0  | 6  | 0  | 0   | 5  | 10 |

|                 |            |     |    |    |    |    |    |    |    |    |    |    |    |    |    |     |     |     |     |     |     |     |     |
|-----------------|------------|-----|----|----|----|----|----|----|----|----|----|----|----|----|----|-----|-----|-----|-----|-----|-----|-----|-----|
| COL6A3          | I3LUR7_PIG | 100 | 85 | 87 | 75 | 96 | 83 | 75 | 92 | 96 | 84 | 78 | 86 | 65 | 73 | 147 | 136 | 109 | 103 | 122 | 121 | 116 | 116 |
| COL6A5          | F1RS99_PIG | 10  | 7  | 4  | 4  | 10 | 7  | 8  | 19 | 3  | 4  | 5  | 4  | 0  | 0  | 0   | 0   | 0   | 0   | 0   | 0   | 0   | 7   |
| EMILIN1         | F1SDQ5_PIG | 2   | 2  | 3  | 0  | 3  | 0  | 0  | 4  | 0  | 0  | 0  | 0  | 0  | 3  | 4   | 0   | 4   | 3   | 4   | 4   | 5   | 2   |
| FBN1_1          | FBN1_PIG   | 8   | 18 | 32 | 15 | 18 | 18 | 13 | 25 | 5  | 8  | 3  | 0  | 0  | 0  | 0   | 4   | 5   | 0   | 0   | 60  | 56  |     |
| FBN1_2          | F1SN67_PIG | 8   | 15 | 28 | 14 | 16 | 18 | 11 | 22 | 4  | 7  | 0  | 0  | 0  | 0  | 0   | 3   | 3   | 0   | 0   | 56  | 48  |     |
| FN1             | F1SS24_PIG | 15  | 14 | 10 | 8  | 7  | 2  | 17 | 5  | 12 | 17 | 19 | 15 | 9  | 9  | 7   | 10  | 10  | 16  | 15  | 13  | 20  | 16  |
| I3LAA4          | I3LAA4_PIG | 3   | 0  | 2  | 1  | 2  | 3  | 7  | 8  | 4  | 0  | 0  | 4  | 0  | 0  | 0   | 6   | 6   | 0   | 0   | 5   | 11  |     |
| I3LQ84          | I3LQ84_PIG | 15  | 15 | 20 | 23 | 17 | 21 | 16 | 19 | 18 | 20 | 17 | 18 | 14 | 15 | 30  | 31  | 12  | 11  | 9   | 11  | 33  | 16  |
| LAMA4           | F1RZM4_PIG | 2   | 2  | 3  | 0  | 2  | 2  | 1  | 2  | 0  | 3  | 0  | 0  | 0  | 0  | 0   | 0   | 0   | 4   | 0   | 0   | 0   |     |
| LAMB1           | F1SAE9_PIG | 3   | 2  | 3  | 2  | 3  | 3  | 3  | 0  | 0  | 0  | 0  | 0  | 0  | 0  | 0   | 0   | 0   | 4   | 0   | 13  | 11  |     |
| LAMB2           | F1SPT5_PIG | 3   | 6  | 13 | 10 | 7  | 11 | 7  | 8  | 10 | 11 | 5  | 7  | 0  | 3  | 12  | 14  | 3   | 12  | 7   | 11  | 16  | 14  |
| LAMC1           | F1S663_PIG | 9   | 7  | 13 | 9  | 10 | 12 | 6  | 8  | 7  | 5  | 0  | 0  | 3  | 0  | 4   | 7   | 7   | 9   | 5   | 4   | 16  | 25  |
| LOC100739576    | I3L9T6_PIG | 3   | 2  | 8  | 4  | 4  | 3  | 2  | 4  | 3  | 2  | 0  | 0  | 0  | 0  | 0   | 0   | 0   | 0   | 0   | 0   | 9   |     |
| POSTN           | I3LDM1_PIG | 3   | 6  | 7  | 6  | 5  | 4  | 7  | 8  | 2  | 4  | 4  | 7  | 0  | 0  | 7   | 5   | 0   | 0   | 4   | 0   | 9   | 7   |
| TGFBI_1         | BGH3_PIG   | 24  | 20 | 13 | 10 | 19 | 20 | 17 | 11 | 8  | 9  | 4  | 8  | 3  | 6  | 14  | 7   | 7   | 0   | 11  | 11  | 0   | 6   |
| TGFBI_2         | F1RHA7_PIG | 11  | 11 | 7  | 4  | 9  | 11 | 12 | 5  | 4  | 5  | 5  | 10 | 4  | 7  | 12  | 5   | 4   | 0   | 0   | 4   | 0   | 6   |
| TGM2            | F1SDX6_PIG | 8   | 15 | 9  | 13 | 12 | 13 | 18 | 12 | 16 | 19 | 24 | 24 | 20 | 21 | 23  | 14  | 19  | 17  | 13  | 22  | 9   | 6   |
| TNC_2           | F1SMI5_PIG | 4   | 5  | 3  | 2  | 5  | 3  | 0  | 0  | 3  | 4  | 0  | 0  | 0  | 0  | 0   | 0   | 0   | 0   | 0   | 0   | 0   | 0   |
| TNC_1           | TENA_PIG   | 8   | 7  | 3  | 2  | 7  | 5  | 0  | 0  | 4  | 4  | 0  | 0  | 0  | 0  | 0   | 0   | 0   | 0   | 0   | 0   | 0   | 6   |
| <b>Membrane</b> |            |     |    |    |    |    |    |    |    |    |    |    |    |    |    |     |     |     |     |     |     |     |     |
| ANXA1           | F1SJB5_PIG | 5   | 3  | 3  | 2  | 6  | 0  | 0  | 0  | 2  | 2  | 4  | 4  | 4  | 3  | 0   | 0   | 4   | 0   | 0   | 0   | 0   | 0   |
| ANXA2           | ANXA2_PIG  | 3   | 6  | 1  | 10 | 6  | 0  | 4  | 8  | 4  | 2  | 4  | 3  | 10 | 9  | 0   | 0   | 0   | 0   | 0   | 0   | 4   | 0   |
| ATP5A1          | ATPA_PIG   | 0   | 1  | 2  | 7  | 5  | 6  | 3  | 3  | 2  | 0  | 0  | 0  | 0  | 3  | 0   | 0   | 0   | 0   | 0   | 0   | 0   | 0   |
| ATP5B           | F1SLA0_PIG | 5   | 7  | 2  | 7  | 3  | 9  | 4  | 4  | 3  | 8  | 0  | 0  | 8  | 9  | 0   | 0   | 0   | 0   | 0   | 0   | 0   | 0   |
| CLTC            | F6PV15_PIG | 5   | 6  | 4  | 7  | 4  | 8  | 0  | 0  | 0  | 0  | 0  | 0  | 0  | 0  | 0   | 0   | 0   | 0   | 0   | 0   | 0   | 0   |
| EHD2            | I3LD72_PIG | 8   | 4  | 4  | 6  | 8  | 2  | 2  | 3  | 3  | 4  | 4  | 4  | 4  | 3  | 0   | 0   | 0   | 0   | 0   | 9   | 0   | 0   |
| ENPP6           | ENPP6_PIG  | 3   | 3  | 2  | 0  | 2  | 2  | 0  | 5  | 0  | 3  | 0  | 0  | 0  | 0  | 0   | 0   | 0   | 0   | 0   | 0   | 0   | 0   |
| IQGAP1_1        | I3LDA8_PIG | 3   | 0  | 4  | 4  | 0  | 3  | 4  | 4  | 0  | 0  | 3  | 0  | 5  | 0  | 0   | 3   | 3   | 3   | 0   | 0   | 0   | 0   |
| IQGAP1_2        | F1RMJ4_PIG | 0   | 0  | 3  | 2  | 0  | 0  | 0  | 0  | 0  | 0  | 0  | 0  | 0  | 0  | 0   | 0   | 0   | 0   | 0   | 0   | 0   | 0   |
| LOC100049693    | F1RR78_PIG | 7   | 8  | 3  | 6  | 13 | 5  | 7  | 7  | 8  | 4  | 15 | 8  | 12 | 13 | 7   | 7   | 6   | 9   | 5   | 19  | 0   | 0   |

|                        |            |    |    |    |   |    |    |    |    |    |    |    |    |    |    |    |    |    |    |    |    |    |   |
|------------------------|------------|----|----|----|---|----|----|----|----|----|----|----|----|----|----|----|----|----|----|----|----|----|---|
| PLG                    | F1SB81_PIG | 0  | 4  | 0  | 0 | 2  | 0  | 4  | 7  | 2  | 2  | 4  | 8  | 0  | 0  | 0  | 0  | 5  | 0  | 0  | 0  | 4  |   |
| VDAC2                  | VDAC2_PIG  | 2  | 2  | 2  | 4 | 0  | 0  | 3  | 3  | 2  | 2  | 4  | 4  | 3  | 0  | 4  | 7  | 3  | 6  | 5  | 6  | 7  | 5 |
| <b><u>Nuclear</u></b>  |            |    |    |    |   |    |    |    |    |    |    |    |    |    |    |    |    |    |    |    |    |    |   |
| DHX9                   | I3LHZ6_PIG | 4  | 3  | 0  | 4 | 3  | 1  | 0  | 0  | 0  | 2  | 0  | 0  | 0  | 0  | 0  | 0  | 0  | 0  | 0  | 0  | 0  |   |
| F1SSL5                 | F1SSL5_PIG | 0  | 0  | 2  | 0 | 0  | 3  | 0  | 0  | 0  | 0  | 0  | 0  | 4  | 3  | 0  | 0  | 0  | 0  | 0  | 0  | 0  |   |
| H2AFV                  | F2Z5P1_PIG | 0  | 0  | 0  | 3 | 0  | 0  | 2  | 0  | 0  | 0  | 5  | 0  | 4  | 4  | 0  | 3  | 3  | 5  | 0  | 0  | 0  |   |
| H2AFX                  | I3L7T6_PIG | 0  | 0  | 0  | 3 | 0  | 0  | 3  | 0  | 0  | 0  | 8  | 0  | 8  | 7  | 7  | 7  | 4  | 6  | 4  | 4  | 0  |   |
| H3F3A                  | H33_PIG    | 0  | 3  | 0  | 0 | 3  | 0  | 4  | 4  | 4  | 3  | 10 | 4  | 5  | 6  | 7  | 7  | 7  | 8  | 4  | 6  | 0  |   |
| H4                     | H4_PIG     | 1  | 2  | 2  | 4 | 4  | 7  | 6  | 5  | 4  | 4  | 11 | 10 | 9  | 7  | 18 | 20 | 21 | 16 | 7  | 9  | 13 |   |
| HIST1H2BD              | F2Z584_PIG | 10 | 9  | 10 | 7 | 9  | 10 | 4  | 6  | 12 | 14 | 9  | 8  | 22 | 27 | 11 | 17 | 13 | 12 | 11 | 0  | 0  |   |
| HIST1H2BN              | F2Z579_PIG | 10 | 9  | 10 | 7 | 9  | 10 | 4  | 6  | 12 | 14 | 9  | 8  | 22 | 27 | 11 | 17 | 13 | 12 | 11 | 0  | 0  |   |
| HIST2H2AA4             | F2Z5L2_PIG | 0  | 4  | 0  | 6 | 3  | 3  | 4  | 4  | 5  | 7  | 13 | 7  | 23 | 22 | 16 | 14 | 15 | 16 | 11 | 13 | 0  |   |
| HIST2H2AB              | F2Z5L6_PIG | 0  | 0  | 0  | 2 | 2  | 0  | 0  | 0  | 0  | 0  | 4  | 0  | 4  | 3  | 5  | 3  | 3  | 3  | 0  | 0  | 0  |   |
| HNRNPK                 | I3LQS0_PIG | 11 | 10 | 10 | 9 | 8  | 5  | 5  | 5  | 2  | 4  | 6  | 7  | 7  | 10 | 12 | 10 | 9  | 9  | 11 | 11 | 11 |   |
| HNRNPU                 | F1S8L9_PIG | 1  | 0  | 2  | 1 | 4  | 3  | 3  | 0  | 0  | 0  | 0  | 0  | 0  | 0  | 0  | 0  | 0  | 4  | 0  | 0  | 0  |   |
| LMNA_1                 | LMNA_PIG   | 6  | 3  | 3  | 5 | 4  | 0  | 8  | 8  | 7  | 7  | 6  | 7  | 8  | 9  | 7  | 7  | 6  | 3  | 0  | 0  | 4  |   |
| LMNA_2                 | F1RLQ2_PIG | 5  | 3  | 3  | 4 | 4  | 0  | 8  | 8  | 5  | 7  | 6  | 7  | 8  | 9  | 7  | 7  | 6  | 3  | 0  | 0  | 4  |   |
| LOC100152878           | F1RTQ5_PIG | 3  | 2  | 2  | 3 | 2  | 3  | 1  | 3  | 1  | 2  | 0  | 0  | 7  | 3  | 0  | 0  | 3  | 0  | 0  | 0  | 0  |   |
| LOC100155734           | F2Z587_PIG | 0  | 4  | 0  | 6 | 3  | 0  | 3  | 3  | 5  | 3  | 10 | 6  | 16 | 15 | 11 | 10 | 10 | 11 | 9  | 9  | 0  |   |
| LOC100157763           | F1RPL3_PIG | 0  | 0  | 0  | 6 | 0  | 3  | 3  | 4  | 5  | 7  | 13 | 7  | 22 | 22 | 12 | 10 | 10 | 11 | 9  | 9  | 0  |   |
| LOC100524253           | F2Z5L0_PIG | 10 | 8  | 10 | 6 | 10 | 10 | 4  | 7  | 12 | 13 | 0  | 0  | 18 | 22 | 9  | 12 | 12 | 0  | 0  | 0  | 0  |   |
| LOC100525821           | F2Z576_PIG | 0  | 3  | 0  | 0 | 3  | 0  | 3  | 3  | 4  | 3  | 9  | 3  | 5  | 4  | 11 | 5  | 7  | 8  | 4  | 6  | 9  |   |
| LOC100622412           | F2Z5K9_PIG | 0  | 3  | 0  | 0 | 3  | 0  | 6  | 3  | 4  | 3  | 13 | 4  | 8  | 6  | 9  | 5  | 6  | 9  | 5  | 9  | 0  |   |
| MYBBP1A                | F1RGP1_PIG | 0  | 0  | 2  | 0 | 0  | 3  | 0  | 0  | 0  | 0  | 0  | 0  | 0  | 0  | 0  | 0  | 6  | 0  | 9  | 0  | 2  |   |
| <b><u>Secreted</u></b> |            |    |    |    |   |    |    |    |    |    |    |    |    |    |    |    |    |    |    |    |    |    |   |
| C3_1                   | CO3_PIG    | 4  | 4  | 6  | 0 | 3  | 2  | 8  | 5  | 2  | 5  | 11 | 10 | 0  | 0  | 5  | 3  | 4  | 0  | 5  | 4  | 7  |   |
| C3_2                   | F1SBS4_PIG | 0  | 0  | 0  | 0 | 0  | 0  | 0  | 0  | 0  | 0  | 0  | 3  | 0  | 0  | 0  | 0  | 0  | 0  | 0  | 0  | 0  |   |
| FGA_1                  | F1RX36_PIG | 6  | 15 | 9  | 4 | 6  | 3  | 18 | 23 | 18 | 17 | 9  | 14 | 4  | 4  | 7  | 5  | 7  | 8  | 5  | 0  | 14 |   |
| FGA_2                  | I3LQR9_PIG | 0  | 13 | 9  | 0 | 6  | 3  | 17 | 23 | 14 | 14 | 0  | 10 | 0  | 0  | 0  | 0  | 0  | 0  | 0  | 0  | 14 |   |
| FGB                    | F1RX37_PIG | 14 | 15 | 12 | 7 | 9  | 6  | 19 | 26 | 22 | 22 | 19 | 21 | 0  | 0  | 5  | 7  | 7  | 9  | 4  | 4  | 13 |   |





**Supplementary Table 5.** Mass spectrometry proteomic assessment of acellular alpha-gal and wild type porcine lungs by cellular location. FDR-corrected exact p-values less than 0.05 are considered statistically significant and are bolded. Shaded boxes indicates unique peptide count median was significantly higher in acellular  $\alpha$ -gal KO porcine lungs than acellular wild type (WT) porcine lungs

| <b>Alpha-gal vs Normal pig lung proteomic comparisons</b> |                    |                      |                                    |
|-----------------------------------------------------------|--------------------|----------------------|------------------------------------|
| <b>Gene name</b>                                          | <b>Accession #</b> | <b>Exact p-value</b> | <b>FDR-corrected exact p-value</b> |
| <b>Cytoplasmic</b>                                        |                    |                      |                                    |
| <b>CBR2</b>                                               | <b>CBR2</b>        | 0.0047               | <b>0.030</b>                       |
| <b>DPYSL2</b>                                             | <b>I3LJE2</b>      | 0.0082               | <b>0.039</b>                       |
| EEF2                                                      | I3LII3             | 0.0272               | 0.089                              |
| EEF1A                                                     | Q0PY11             | 0.0326               | 0.099                              |
| HSPB1                                                     | HSPB1              | 0.4961               | 0.641                              |
| HSPG2                                                     | F1SU03             | 0.6139               | 0.728                              |
| Ssc_41914                                                 | F1STM4             | 1.0000               | 1.009                              |
| <b>Cytoskeletal</b>                                       |                    |                      |                                    |
| <b>MYH10</b>                                              | <b>F1SSA6</b>      | 0.0001               | <b>0.014</b>                       |
| <b>HBA</b>                                                | <b>HBA</b>         | 0.0002               | <b>0.007</b>                       |
| <b>ACTB</b>                                               | <b>ACTB</b>        | 0.0010               | <b>0.019</b>                       |
| <b>ACTA2</b>                                              | <b>C7AI81</b>      | 0.0015               | <b>0.019</b>                       |
| <b>MYH9</b>                                               | <b>F1SKJ1</b>      | 0.0019               | <b>0.020</b>                       |
| <b>LOC100621981</b>                                       | <b>I3L5B3</b>      | 0.0020               | <b>0.019</b>                       |
| <b>LOC100511457_2</b>                                     | <b>I3LIE3</b>      | 0.0020               | <b>0.018</b>                       |
| <b>ACTC1</b>                                              | <b>B6VNT8</b>      | 0.0062               | <b>0.033</b>                       |
| <b>LOC100511457_1</b>                                     | <b>I3LV99</b>      | 0.0082               | <b>0.038</b>                       |
| TLN1                                                      | F1SFZ8             | 0.0204               | 0.071                              |
| DES                                                       | DESM               | 0.0282               | 0.090                              |
| NUMA1                                                     | F1SUX4             | 0.0331               | 0.098                              |
| MYH11_2                                                   | MYH11              | 0.0382               | 0.110                              |
| CCT6A                                                     | F1RIU3             | 0.0451               | 0.121                              |
| MYH11_1                                                   | F1SKIO             | 0.0478               | 0.125                              |
| FLNC                                                      | F1SMN5             | 0.0495               | 0.126                              |
| VCL                                                       | VINC               | 0.1071               | 0.216                              |
| TPM3                                                      | Q6QA25             | 0.1140               | 0.226                              |

|                     |               |        |              |
|---------------------|---------------|--------|--------------|
| I3LIQ9              | I3LIQ9        | 0.1154 | 0.221        |
| MYL6                | MYL6          | 0.1266 | 0.239        |
| TUBB                | TBB5          | 0.1344 | 0.241        |
| MYO1C               | I3LIL4        | 0.1356 | 0.240        |
| I3LJ44              | I3LJ44        | 0.1561 | 0.272        |
| LOC100620928        | F1S6M7        | 0.1617 | 0.278        |
| LOC100621514        | I3LDR2        | 0.1658 | 0.280        |
| I3LCX2              | I3LCX2        | 0.1883 | 0.314        |
| MACF1               | F1SV22        | 0.2265 | 0.372        |
| EZR                 | F1SB42        | 0.3393 | 0.494        |
| TUBA4A              | F2Z5S8        | 0.3610 | 0.506        |
| MSN                 | F1RTN3        | 0.3679 | 0.510        |
| TUBA1B              | F2Z5T5        | 0.4106 | 0.549        |
| VIM                 | VIME          | 0.5995 | 0.718        |
| TUBB6               | I3LBV1        | 0.6379 | 0.749        |
| TUBB1               | A5GFX6        | 0.7365 | 0.856        |
| TUBB4A              | F2Z5K5        | 0.7474 | 0.859        |
| KRT19               | F1S0J8        | 0.7490 | 0.853        |
| TUBB2B              | F2Z5B2        | 0.7793 | 0.879        |
| LOC100517284        | F1RI39        | 0.8156 | 0.911        |
| TUBB4B              | F2Z571        | 0.8638 | 0.920        |
| F1RJU6              | F1RJU6        | 1.0000 | 1.018        |
| YWHAZ               | F2Z558        | 0.0865 | 0.188        |
| <b><u>ECM</u></b>   |               |        |              |
| <b>TGFBI_1</b>      | <b>BGH3</b>   | 0.0050 | <b>0.030</b> |
| <b>COL1A2</b>       | <b>F1SFA7</b> | 0.0051 | <b>0.029</b> |
| <b>TNC_2</b>        | <b>F1SMI5</b> | 0.0052 | <b>0.029</b> |
| <b>COL6A5</b>       | <b>F1RS99</b> | 0.0062 | <b>0.031</b> |
| <b>LOC100739576</b> | <b>I3L9T6</b> | 0.0102 | <b>0.044</b> |
| LAMA4               | F1RZM4        | 0.0145 | 0.059        |
| TNC_1               | TENA          | 0.0175 | 0.069        |
| COL6A1              | I3LS72        | 0.0403 | 0.110        |
| COL6A3              | I3LUR7        | 0.0528 | 0.127        |
| TGFBI_2             | F1RHA7        | 0.0628 | 0.142        |
| TGM2                | F1SDX6        | 0.0912 | 0.194        |
| EMILIN1             | F1SDQ5        | 0.1324 | 0.246        |
| COL14A1             | F1S285        | 0.2276 | 0.369        |
| POSTN               | I3LDM1        | 0.2576 | 0.406        |
| FN1                 | F1SS24        | 0.3209 | 0.486        |
| COL1A1              | F1RT61        | 0.3584 | 0.509        |
| LAMC1               | F1S663        | 0.4609 | 0.602        |

|                        |               |        |              |
|------------------------|---------------|--------|--------------|
| FBN1_2                 | F1SN67        | 0.5217 | 0.659        |
| FBN1_1                 | FBN1          | 0.5456 | 0.682        |
| I3LQ84                 | I3LQ84        | 0.8370 | 0.917        |
| I3LAA4                 | I3LAA4        | 0.8534 | 0.917        |
| LAMB1                  | F1SAE9        | 0.8934 | 0.934        |
| LAMB2                  | F1SPT5        | 0.9647 | 0.990        |
| <b><u>Membrane</u></b> |               |        |              |
| <b>VDAC2</b>           | <b>VDAC2</b>  | 0.0085 | <b>0.038</b> |
| ATP5A1                 | ATPA          | 0.0192 | 0.071        |
| ENPP6                  | ENPP6         | 0.0202 | 0.073        |
| ATP5B                  | F1SLA0        | 0.0214 | 0.072        |
| CLTC                   | F6PV15        | 0.0395 | 0.111        |
| EHD2                   | I3LD72        | 0.0584 | 0.137        |
| ANXA2                  | ANXA2         | 0.2798 | 0.435        |
| LOC100049693           | F1RR78        | 0.3529 | 0.507        |
| IQGAP1_1               | I3LDA8        | 0.4027 | 0.545        |
| ANXA1                  | F1SJB5        | 0.4188 | 0.554        |
| IQGAP1_2               | F1RMJ4        | 0.5000 | 0.639        |
| PLG                    | F1SB81        | 0.8330 | 0.921        |
| <b><u>Nuclear</u></b>  |               |        |              |
| <b>LOC100525821</b>    | <b>F2Z576</b> | 0.0001 | <b>0.005</b> |
| <b>H4</b>              | <b>H4</b>     | 0.0001 | <b>0.007</b> |
| <b>LOC100622412</b>    | <b>F2Z5K9</b> | 0.0004 | <b>0.009</b> |
| <b>HIST2H2AA4</b>      | <b>F2Z5L2</b> | 0.0015 | <b>0.022</b> |
| <b>H2AFX</b>           | <b>I3L7T6</b> | 0.0017 | <b>0.020</b> |
| <b>H3F3A</b>           | <b>H33</b>    | 0.0027 | <b>0.023</b> |
| <b>LOC100155734</b>    | <b>F2Z587</b> | 0.0037 | <b>0.029</b> |
| <b>LOC100157763</b>    | <b>F1RPL3</b> | 0.0045 | <b>0.030</b> |
| HIST2H2AB              | F2Z5L6        | 0.0176 | 0.067        |
| DHX9                   | I3LHZ6        | 0.0507 | 0.124        |
| H2AFV                  | F2Z5P1        | 0.0619 | 0.142        |
| HNRNPK                 | I3LQS0        | 0.0773 | 0.171        |
| HNRNPU                 | F1S8L9        | 0.1058 | 0.217        |
| LOC100152878           | F1RTQ5        | 0.1141 | 0.222        |
| MYBBP1A                | F1RGP1        | 0.2335 | 0.373        |
| LOC100524253           | F2Z5L0        | 0.3252 | 0.486        |
| HIST1H2BN              | F2Z579        | 0.5987 | 0.725        |
| HIST1H2BD              | F2Z584        | 0.5987 | 0.732        |
| F1SSL5                 | F1SSL5        | 0.8393 | 0.911        |
| LMNA_1                 | LMNA          | 0.8841 | 0.933        |
| LMNA_2                 | F1RLQ2        | 0.8965 | 0.929        |

| <u>Secreted</u> |               |        |              |
|-----------------|---------------|--------|--------------|
| <b>HBB_1</b>    | <b>F1RII7</b> | 0.0011 | <b>0.018</b> |
| <b>HBB_2</b>    | <b>HBB</b>    | 0.0044 | <b>0.031</b> |
| FGA_2           | I3LQR9        | 0.0303 | 0.094        |
| VWF             | VWF           | 0.0495 | 0.124        |
| FGB             | F1RX37        | 0.0957 | 0.200        |
| FGA_1           | F1RX36        | 0.1340 | 0.245        |
| LOC100627396    | F1RX35        | 0.3084 | 0.473        |
| C3_2            | F1SBS4        | 0.3750 | 0.513        |
| C3_1            | CO3           | 0.5868 | 0.726        |
| HBE1            | F1RII6        | 1.0000 | 1.000        |
| <u>Unknown</u>  |               |        |              |
| I3LP72          | I3LP72        | 0.3393 | 0.500        |

**Supplemental Figure 1: Anionic detergent detection of effluents during decellularization of wild type and  $\alpha$ -gal KO pig lungs revealed no significant differences.** SDC concentration consecutive DI water washes after incubation of the lungs with the respective solution. The data from the wild type lungs was already published before as absolute absorption at 630 nm (27) but converted to SDC % concentration.

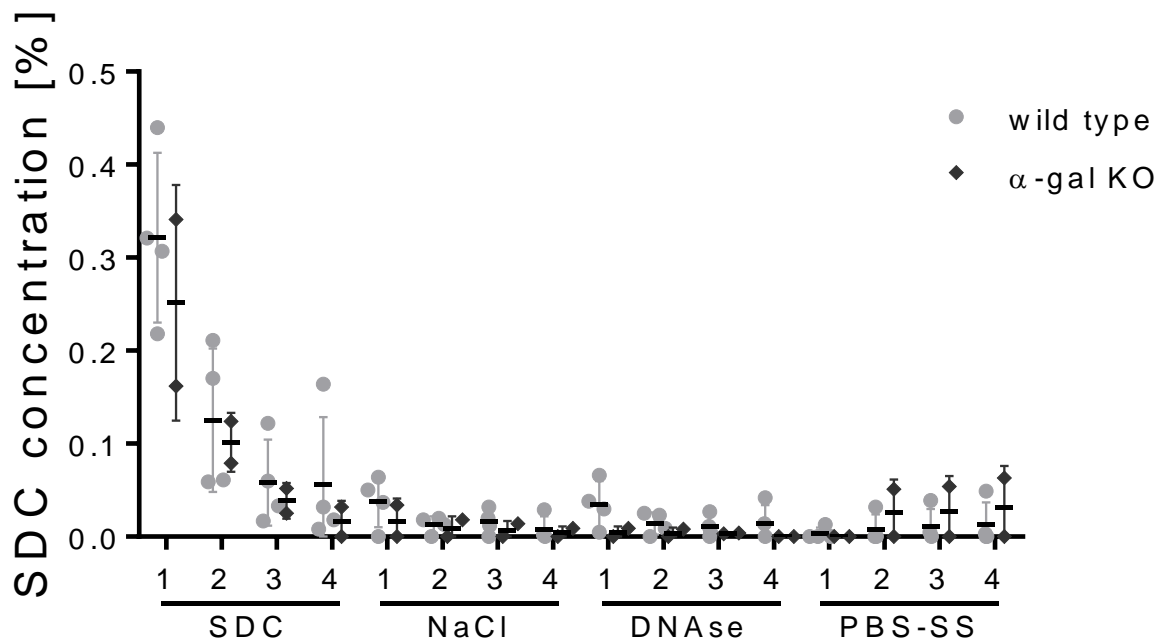

**Supplemental Figure 2: Isolectin B4 staining in incompletely decellularized wild type pig lungs demonstrates residual  $\alpha$ -galactosylated proteins or protein debris.** Representative image from an incompletely decellularized wild type pig lung demonstrates areas of positive (red) staining (arrow, insert) can be observed in both non-adsorbed and galactose-preadsorbed lectin stainings along with residual DAPI-positive (blue) cell nuclei. Original magnification 200X.

wild type

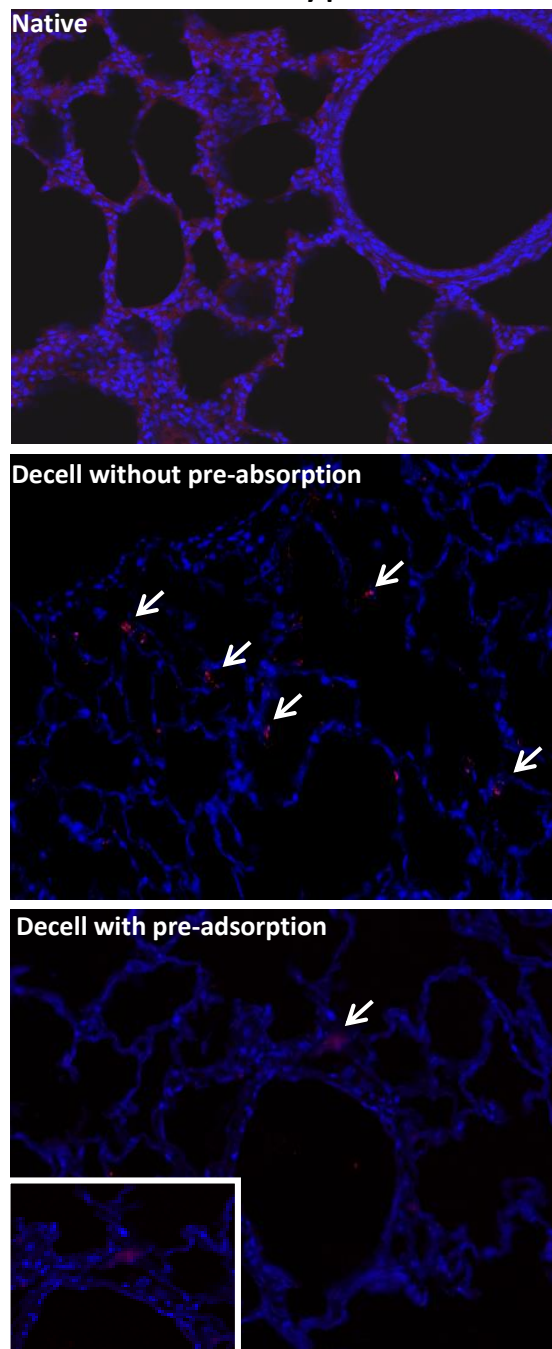

Supplement: Supp_Data.pdf [file Supp_Data.pdf]
